# Supplementary material for: A study of crack formation and propagation in LaZrCeO/YSZ thermal barrier coatings at different temperatures
Source: Royal Society of Chemistry journal article supplement (doi:10.1039/c9qi00580c), 2019-01-01
Supplement: c9qi00580c1.pdf [file c9qi00580c1.pdf]

## **Supporting Information**

### **A Study of Crack Formation and Propagation in LaZrCeO/YSZ**

#### **Thermal Barrier Coatings at Different Temperatures**

**Zaoyu Shen, Limin He, Rende Mu\*, Zhenhua Xu and Guanghong Huang**

Key Laboratory of Advanced Corrosion and Protection for Aviation Materials,  
Beijing Institute of Aeronautical Materials, Aero Engine Corporation of China,  
Beijing 100095 (PR China)

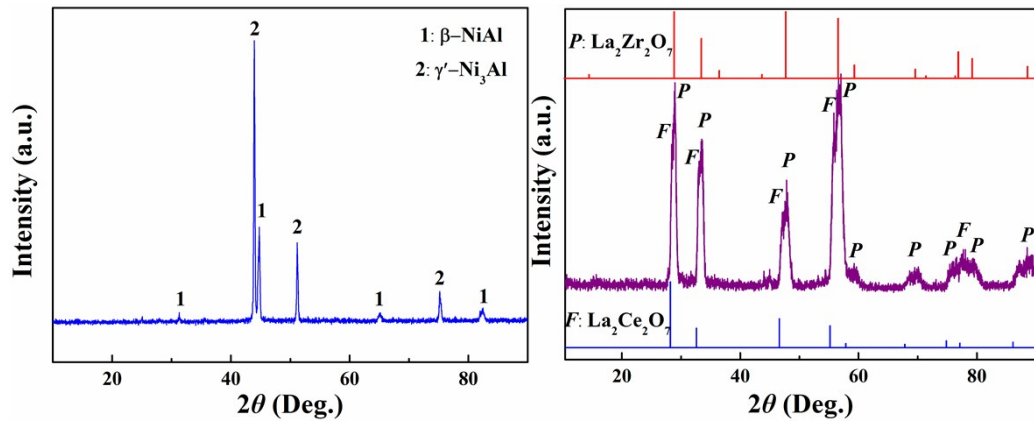

**Fig. S1** (a) XRD patterns of the NiCoCrAlYHf coating and (b) XRD patterns of the LaZrCeO/YSZ DCL coating.

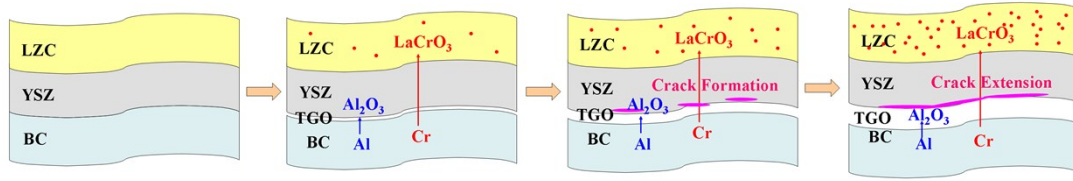

**Fig. S2** Schematic illustration of the oxidation, crack formation and propagation upon TGO thickening and Cr outward diffusion during thermal shock test.
